# Supplementary material for: Genetic testing for Parkinson disease: current practice, knowledge, and attitudes among US and Canadian movement disorders specialists
Source: PubMed Central journal article supplement — Genet Med. 2019 Nov 4;22(3):574–80. doi: 10.1038/s41436-019-0684-x (PMC7056638; doi:10.1038/s41436-019-0684-x), 2019-11-04
Supplement: 41436_2019_684_MOESM1_ESM.pdf [file 41436_2019_684_MOESM1_ESM.pdf]

**Survey of PSG Clinicians on Genetics and Genetic Testing in Parkinson's disease**

**Section A. Demographic information. You are:**

**Sex**                      Male                      Female

**Age**                      <40      41-50      51-60      >60

**Location of your Parkinson's clinic. For Canada, please select "Canada (all time zones)". For US, please select time zone.**

Eastern

Central

Mountain

Pacific (including Alaska and Hawaii)

Canada (all time zones)

**Section B. LRRK2, GBA, and other Parkinson's risk genes in your clinic population**

**How many patients with PD did you personally provide care for over the last 12 months? \_\_\_\_\_**

**How many PD patients for whom you have provided care in the last 12 months have had the following kinds of genetic tests?**

a) Clinical genetic testing ordered by a health care provider: \_\_\_\_\_

b) Genetic testing performed by a direct-to-consumer (DTC) company (such as 23andMe): \_\_\_\_\_

c) Genetic test results provided to the patient as part of participation in a research study (such as Parkinson's Progression Marker Initiative [PPMI]): \_\_\_\_\_

d) Genetic testing as part of a research study where NO results were provided to the patient but results were returned to you or a collaborating investigator: \_\_\_\_\_

e) DNA banking as part of a research study where NO results were provided to the patient: \_\_\_\_\_

f) Refused genetic testing: \_\_\_\_\_

**How many patients for whom you have provided care in the last 12 months have a genetically-proven**

**A. LRRK2 variant associated with PD? \_\_\_\_\_**

**B. GBA variant associated with PD? \_\_\_\_\_**

- C. Parkin variant associated with PD? \_\_\_\_\_
- D. Alpha-synuclein variant associated with PD? \_\_\_\_\_
- E. DJ-1 variant associated with PD? \_\_\_\_\_
- F. PINK1 variant associated with PD? \_\_\_\_\_
- G. VPS35 variant associated with PD? \_\_\_\_\_
- H. Other (specify)\_\_\_\_\_

**Section C. Genetics services and utilization**

**Do your PD patients have access to the services of a genetic counselor through your institution?**

Yes

No

*(this question branches off of the previous question, and will only be shown if participants select “yes”)* Please select the ways in which your patients can access the services of a genetic counselor through your institution. You are able to check multiple boxes.

In the Neurology/Parkinson’s Clinic

Within my institution but not in the Neurology/Parkinson’s Clinic

via telephone/telemedicine while in my clinic

Patients are referred outside my institution to receive genetic counseling

Other

*(this question branches off of the previous question, and will only be shown if a participant selects “other”)* If you selected “other” to the previous question please provide the locations here:

\_\_\_\_\_

**If, next week, you ordered a genetic test for LRRK2 for a patient already diagnosed with PD would you: (SELECT ONE)**

\_\_\_\_\_ I will provide the genetic counseling and would not involve a genetic counselor

\_\_\_\_\_ definitely involve a genetic counselor before the blood is drawn AND at the time that results are given to the patient

\_\_\_\_\_ definitely involve a genetic counselor at the time that results are given to the patient, but not before the blood draw

\_\_\_\_\_ definitely involve a genetic counselor before the blood draw, but not at the time that results are given to the patient

\_\_\_\_\_ suggest to the patient or family, before the blood draw, the option of a referral to a genetic counselor

\_\_\_\_\_ suggest to the patient or family, after results are given, the option of a referral to a genetic counselor

\_\_\_\_\_ refer the patient or family to a genetic counselor if they request it

\_\_\_\_\_ not involve a genetic counselor

\_\_\_\_\_ I would not order the test as part of clinical care

**10. To what extent do any of the following keep you from ordering genetic tests for patients with PD in your clinic?**

| Potential barrier                                                                                                       | No barrier..... Constant barrier<br>0---10---20---30---40---50---60---70---80---90---100 |
|-------------------------------------------------------------------------------------------------------------------------|------------------------------------------------------------------------------------------|
| Insurance doesn't pay/patients can't afford                                                                             | 0---10---20---30---40---50---60---70---80---90---100                                     |
| Patients don't want a genetic test                                                                                      | 0---10---20---30---40---50---60---70---80---90---100                                     |
| I don't know what test to order/ lab to use                                                                             | 0---10---20---30---40---50---60---70---80---90---100                                     |
| I don't feel comfortable explaining the meaning of test results to patients                                             | 0---10---20---30---40---50---60---70---80---90---100                                     |
| Genetic test results would not change my approach to therapy                                                            | 0---10---20---30---40---50---60---70---80---90---100                                     |
| Genetic test results would not change the patient's prognosis                                                           | 0---10---20---30---40---50---60---70---80---90---100                                     |
| I am concerned about the impact of a genetic test on the patient's employability/ insurability                          | 0---10---20---30---40---50---60---70---80---90---100                                     |
| I am worried about the implications of the patient's genetic test results for his/her children and other family members | 0---10---20---30---40---50---60---70---80---90---100                                     |

**The Parkinson's Foundation plans, through its Genetics Research Initiative, to facilitate clinical genetic testing for *GBA* and *LRRK2* in patients with PD. This initiative was established in part to familiarize the**

medical and patient community with the growing importance of genetics in the diagnosis, prognosis, and management of PD, and also to facilitate the entry of appropriate patients into genotype-specific clinical trials. Genetic counseling will either be performed by a centralized genetic counseling team or in your PD clinic with compensation for phlebotomy and counseling. Knowing that information, how do you feel about the following?

YES \_\_\_\_ NO \_\_\_\_ NOT SURE \_\_\_\_ I think that this initiative will greatly improve my patients' access to genetic tests

YES \_\_\_\_ NO \_\_\_\_ NOT SURE \_\_\_\_ I would be likely to order tests on the majority of my patients

YES \_\_\_\_ NO \_\_\_\_ NOT SURE \_\_\_\_ I feel that I am equipped to counsel patients adequately about the clinical relevance of both normal and abnormal genetic test results

YES \_\_\_\_ NO \_\_\_\_ NOT SURE \_\_\_\_ I would like a genetic counselor to be involved with counseling and testing of patients at my site

YES \_\_\_\_ NO \_\_\_\_ NOT SURE \_\_\_\_ I have ethical concerns about such initiative

If you have concerns about this initiative, please describe:

**Section D. Knowledge/attitudes about genetics and genetic testing. Please note that your responses will remain anonymous to study investigators.**

Your 65-year-old male PD patient of non-Ashkenazi heritage came to your clinic today to discuss the results of a genetic test that looked for the 5 most common Gaucher disease-associated *GBA* variants. The test showed that he has one gene with a *GBA* L444P variant and one that is normal for the 5 variants assayed.

Please rely on your current knowledge and opinions in selecting your candid response to the following statements about this case:

| Agree | Disagree | Uncertain |                                                                                                   |
|-------|----------|-----------|---------------------------------------------------------------------------------------------------|
|       |          |           | This patient must have some Ashkenazi background but just doesn't know it                         |
|       |          |           | This patient has <i>GBA</i> -associated PD                                                        |
|       |          |           | This patient does not have <i>GBA</i> -associated PD, because one copy of the gene is normal      |
|       |          |           | This patient is more likely to have cognitive impairment sooner than a patient with idiopathic PD |
|       |          |           | Deep Brain Stimulation would NOT be expected to help this patient's motor symptoms                |
|       |          |           | Each of this patient's biological children has a 50% chance of developing Parkinson's disease     |
|       |          |           | Each of this patient's biological children has a 50% chance of developing Gaucher disease         |

**A 60-year-old male PD patient of Ashkenazi background with a positive family history of Parkinson’s comes to your clinic to discuss the results of their LRRK2 genetic test, which shows a G2019S variant on one copy of the gene, with the other copy showing no variants.**

**Please agree or disagree with the following statements about this case:**

| Agree | Disagree | Uncertain |                                                                                                   |
|-------|----------|-----------|---------------------------------------------------------------------------------------------------|
|       |          |           | This patient has LRRK2-associated PD                                                              |
|       |          |           | This patient does not have LRRK2-associated PD, because one copy of the gene is normal            |
|       |          |           | This patient is more likely to have cognitive impairment sooner than a patient with idiopathic PD |
|       |          |           | Deep Brain Stimulation would NOT be expected to help this patient’s motor symptoms                |
|       |          |           | Each of this patient’s biological children has a 50% chance of developing Parkinson’s disease     |
|       |          |           | Each of this patient’s biological children has a 50% chance of developing Gaucher disease         |
|       |          |           | Testing for the G2019S variant is available through Direct-to-Consumer testing                    |

**Finally, we recognize that PD genetics is a new and rapidly evolving field. We want to gauge your comfort level with genetic counseling and testing. As such please, rate on the scale from 0 (not at all) to 10 (proficient)**

0----10----20----30----40----50----60----70----80----90----100

Not Confident Very Confident

I am confident in my knowledge of the impact of various genetic mutations on PD phenotypic manifestations

0----10----20----30----40----50----60----70----80----90----100

Not Confident Very Confident

I am confident that I am up to date on genetically targeted experimental therapeutics on GBA and LRRK2-related trial

0----10----20----30----40----50----60----70----80----90----100

Not Comfortable

Very Comfortable

I am comfortable counseling my PD patients on GBA and LRRK2 testing

**For the remaining questions, we will be asking about your knowledge and understanding of genetic factors related to Parkinson's disease.**

**A genetic test for Parkinson's disease can detect all genetic mutations related to Parkinson's disease. (True/False)**

**Environmental factors can increase the risk of Parkinson's disease. (True/False)**

**A negative genetic test for Parkinson's disease means a person does not have Parkinson's disease. (True/False)**

**Everyone with a LRRK2 or GBA gene mutation will develop Parkinson's disease. (True/False)**

**A genetic mutation is simply a change in a gene. (True/False)**

**Genetic test results can be used to determine eligibility for clinical trials. (True/False)**

**A person with no family history of Parkinson's disease can have an inherited Parkinson's gene mutation. (True/False)**

#### **E. Comments**

**Thank you for your participation in this survey. We appreciate your honesty and responsiveness to our questionnaire.**

**Please contact Roseanna Battista at [Roseanna.Battista@chet.rochester.edu](mailto:Roseanna.Battista@chet.rochester.edu) indicating that you have completed the survey to obtain your \$30 Amazon gift card.**

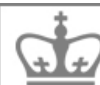

**Columbia University IRB**

IRB-AAAS1195 (Y01M03)

IRB Exemption Date: 03/21/2019
